# Supplementary material for: Meta-Analysis of Aquaporin Gene Family in <em>Triticum turgidum</em> and Its Expression Profile in Response to Salt Stress
Source: Preprints.org preprint supplement (doi:10.20944/preprints202212.0281.v1), 2022-12-15
Supplement: Supplementary file 1 [file Table S1.xlsx]

## Sheet: Sheet1
Gene name	Primer type	Primer sequence (5'-3-')	Product size
TtAQP58	Forward	TGACCTTTGGGCTGTTCTTG	127
	Reverse	ATGTACAGACCCTGCTGGAAG
TtAQP29	Forward	AAACCTGGAAGCAACACTGG	63
	Reverse	CAGCACGATCTTGTGGTAGAAC
TtAQP18	Forward	AGCATGCACTTGAAGCACTG	85
	Reverse	TGAACACGAAGAGGAAGGTG
TtAQP42	Forward	GACCAACCATTGGGTCTACTG	92
	Reverse	GCGTCTTCGTCACCATAAAC
TtAQP34	Forward	TGCGTTAAGTGTCGGTGTTC	126
	Reverse	CTGGCAATCCATGTCTTCAC
TtAQP79	Forward	ACAACACCGCCAAGGACTAC	134
	Reverse	CACGGTCACGTAGACGAAGAG
Actin-7	Forward	ATGTCGCAATCCAGGCCGTT	150
	Reverse	GGCCAGCAAGGTCCAAACGA
