# Supplementary material for: Meta-Analysis of Aquaporin Gene Family in <em>Triticum turgidum</em> and Its Expression Profile in Response to Salt Stress
Source: Preprints.org preprint supplement (doi:10.20944/preprints202212.0281.v1), 2022-12-15
Supplement: Supplementary file 2 [file Table S2.xlsx]

## Sheet: Sheet1
Gene ID	Gene name	CDS (bp)	Peptide (aa)	Exon number	Isoelectric point (pI)	MW (KDa)	GRAVY	Stability	Subsecullar localization
TRITD1Av1G106730	TtAQP01	792	263	3	8.45	27.55	0.568	stable	endomembrane system
TRITD1Av1G115640	TtAQP02	903	300	4	8.98	31.14	0.523	stable	organelle membrane-plasma membrane
TRITD1Bv1G107010	TtAQP03	792	263	3	8.45	27.58	0.566	stable	endomembrane system
TRITD1Bv1G119210	TtAQP04	897	298	4	9.21	30.91	0.509	stable	organelle membrane-endomembrane system
TRITD2Av1G014760	TtAQP05	1059	352	2	9.66	37.61	0.286	unstable	organelle membrane-plasma membrane
TRITD2Av1G071530	TtAQP06	894	297	3	9.01	30.98	0.369	stable	plasma membrane-endomembrane system
TRITD2Av1G222850	TtAQP07	798	265	3	9.24	27.51	0.655	stable	endomembrane system
TRITD2Av1G224740	TtAQP08	888	295	3	7.75	31.08	0.524	stable	endomembrane system-plasma membrane
TRITD2Av1G240050	TtAQP09	921	306	4	11.05	33.73	-0.462	unstable	plasma membrane-organelle membrane
TRITD2Av1G243750	TtAQP10	747	248	3	6.37	25.12	0.885	stable	endomembrane system
TRITD2Av1G243760	TtAQP11	789	262	3	7.41	26.93	0.704	stable	endomembrane system-plasma membrane
TRITD2Bv1G019580	TtAQP12	855	284	2	9.42	29.83	0.547	stable	endomembrane system-plasma membrane
TRITD2Bv1G080560	TtAQP13	873	290	3	8.11	30.36	0.612	stable	plasma membrane-endomembrane system
TRITD2Bv1G184920	TtAQP14	798	265	3	7.56	27.48	0.615	stable	endomembrane system
TRITD2Bv1G187220	TtAQP15	873	290	3	7.75	30.38	0.508	stable	plasma membrane-endomembrane system
TRITD2Bv1G201750	TtAQP16	867	288	4	8.98	30.68	0.378	stable	plasma membrane-organelle membrane
TRITD2Bv1G204380	TtAQP17	747	248	3	6.2	25.14	0.838	stable	endomembrane system
TRITD2Bv1G204390	TtAQP18	789	262	3	7.19	26.91	0.73	stable	endomembrane system-plasma membrane
TRITD3Av1G002890	TtAQP19	867	288	3	9.2	29.8	0.658	stable	plasma membrane
TRITD3Av1G050960	TtAQP20	777	258	5	6.83	26.96	0.529	stable	endomembrane system-plasma membrane
TRITD3Av1G286310	TtAQP21	759	252	2	5.47	25.52	0.899	stable	endomembrane system
TRITD3Bv1G002420	TtAQP22	867	288	3	9.2	29.86	0.594	stable	plasma membrane
TRITD3Bv1G057490	TtAQP23	807	268	5	7.22	27.97	0.489	stable	plasma membrane-organelle membrane
TRITD3Bv1G070600	TtAQP24	756	251	2	7.17	25.35	0.888	stable	endomembrane system
TRITD3Bv1G188130	TtAQP25	765	254	4	6.98	26.28	0.79	stable	plasma membrane-endomembrane system
TRITD3Bv1G282090	TtAQP26	759	252	2	5.47	25.53	0.9	stable	endomembrane system
TRITD4Av1G064260	TtAQP27	1179	392	6	8.69	41.51	0.293	stable	endomembrane system
TRITD4Av1G141900	TtAQP28	735	244	3	8.47	25.48	0.736	stable	endomembrane system-plasma membrane
TRITD4Av1G199100	TtAQP29	915	304	4	7.93	31.77	0.467	stable	endomembrane system-plasma membrane
TRITD4Av1G205860	TtAQP30	879	292	2	7.74	30.79	0.482	stable	plasma membrane-endomembrane system
TRITD4Av1G227310	TtAQP31	807	268	3	8.02	27.67	0.938	stable	endomembrane system-plasma membrane
TRITD4Bv1G007950	TtAQP32	909	302	4	8.42	31.7	0.433	stable	plasma membrane-endomembrane system
TRITD4Bv1G060070	TtAQP33	735	244	3	8.47	25.50	0.726	stable	endomembrane system-plasma membrane
TRITD4Bv1G111480	TtAQP34	897	298	4	10.04	31.86	0.554	stable	endomembrane system
TRITD4Bv1G178880	TtAQP35	831	276	3	6.7	28.44	0.829	stable	endomembrane system-plasma membrane
TRITD4Bv1G194950	TtAQP36	768	255	3	6.6	26.39	0.805	stable	endomembrane system
TRITD4Bv1G199390	TtAQP37	987	328	1	8.59	34.4	0.423	stable	organelle membrane
TRITD5Av1G056620	TtAQP38	861	286	3	7.76	29.68	0.544	stable	plasma membrane-endomembrane system
TRITD5Av1G131660	TtAQP39	873	290	3	8.44	30.77	0.382	stable	plasma membrane-organelle membrane
TRITD5Av1G186110	TtAQP40	876	291	3	8.74	30.27	0.603	stable	plasma membrane-endomembrane system
TRITD5Av1G189030	TtAQP41	870	289	4	6.63	30.11	0.428	stable	plasma membrane-organelle membrane
TRITD5Av1G246290	TtAQP42	492	163	3	4.66	16.71	0.717	stable	endomembrane system-organelle membrane
TRITD5Av1G248170	TtAQP43	780	259	4	7.62	27.15	0.725	stable	plasma membrane
TRITD5Av1G249780	TtAQP44	879	292	1	8.45	30.3	0.43	stable	plasma membrane-endomembrane system
TRITD5Bv1G110890	TtAQP45	939	312	4	8.32	33.27	0.336	stable	plasma membrane
TRITD5Bv1G176040	TtAQP46	876	291	3	8.96	30.18	0.596	stable	plasma membrane-endomembrane system
TRITD5Bv1G180190	TtAQP47	867	288	4	7.03	29.93	0.458	stable	plasma membrane-organelle membrane
TRITD5Bv1G252790	TtAQP48	876	291	1	8.14	30.48	0.541	stable	endomembrane system-plasma membrane
TRITD5Bv1G252800	TtAQP49	876	291	1	8.73	30.58	0.496	stable	plasma membrane-endomembrane system
TRITD6Av1G021120	TtAQP50	888	295	1	9.04	30.95	0.397	stable	plasma membrane-endomembrane system
TRITD6Av1G141150	TtAQP51	888	295	4	9.22	31.67	0.208	unstable	endomembrane system-plasma membrane
TRITD6Av1G156510	TtAQP52	873	290	4	9.01	30.91	0.345	stable	plasma membrane
TRITD6Av1G159570	TtAQP53	750	249	3	5.95	25.19	0.88	stable	endomembrane system
TRITD6Av1G189010	TtAQP54	888	295	5	7.25	31.61	0.442	stable	endomembrane system
TRITD6Av1G223080	TtAQP55	879	292	3	8.13	30.87	0.395	stable	plasma membrane
TRITD6Av1G223090	TtAQP56	879	292	3	8.12	30.95	0.375	stable	plasma membrane
TRITD6Bv1G033710	TtAQP57	888	295	1	9.04	30.86	0.408	stable	plasma membrane-endomembrane system
TRITD6Bv1G135730	TtAQP58	867	288	4	7.73	30.55	0.476	stable	plasma membrane-endomembrane system
TRITD6Bv1G142920	TtAQP59	873	290	4	9	30.84	0.348	stable	plasma membrane
TRITD6Bv1G145380	TtAQP60	750	249	3	5.95	25.26	0.884	stable	endomembrane system
TRITD6Bv1G179310	TtAQP61	888	295	5	7.25	31.67	0.422	stable	endomembrane system-plasma membrane
TRITD6Bv1G209810	TtAQP62	474	157	2	8.33	16.99	0.319	stable	plasma membrane-organelle membrane
TRITD6Bv1G223370	TtAQP63	879	292	3	8.13	30.87	0.395	stable	plasma membrane
TRITD6Bv1G223380	TtAQP64	879	292	3	8.12	30.95	0.375	stable	plasma membrane
TRITD7Av1G061100	TtAQP65	903	300	5	7.45	32.24	0.411	stable	endomembrane system-plasma membrane
TRITD7Av1G063490	TtAQP66	918	305	4	7.91	32.22	0.48	stable	plasma membrane-endomembrane system
TRITD7Av1G076170	TtAQP67	837	278	4	9.57	29.56	0.392	stable	plasma membrane-endomembrane system
TRITD7Av1G156560	TtAQP68	840	279	3	9.54	28.55	0.738	stable	endomembrane system-plasma membrane
TRITD7Av1G176380	TtAQP69	750	249	3	5.46	25.31	0.892	stable	endomembrane system
TRITD7Av1G190680	TtAQP70	840	279	5	7.47	29.88	0.456	stable	plasma membrane-endomembrane system
TRITD7Av1G276680	TtAQP71	702	233	3	9.71	24.66	0.709	stable	endomembrane system-plasma membrane
TRITD7Bv1G000470	TtAQP72	855	284	1	9.98	29.81	0.412	stable	plasma membrane-endomembrane system
TRITD7Bv1G000850	TtAQP73	876	291	1	8.44	30.51	0.52	stable	endomembrane system-plasma membrane
TRITD7Bv1G000860	TtAQP74	876	291	1	8.14	30.45	0.529	stable	plasma membrane-endomembrane system
TRITD7Bv1G038470	TtAQP75	903	300	5	7.45	32.27	0.41	stable	endomembrane system-plasma membrane
TRITD7Bv1G040260	TtAQP76	915	304	4	7.91	32.14	0.48	stable	endomembrane system-plasma membrane
TRITD7Bv1G051580	TtAQP77	837	278	4	9.57	29.53	0.415	stable	plasma membrane-endomembrane system
TRITD7Bv1G115860	TtAQP78	546	181	4	10.02	18.75	0.351	stable	organelle membrane
TRITD7Bv1G138210	TtAQP79	747	248	3	5.46	25.21	0.871	stable	endomembrane system
TRITD0Uv1G066680	TtAQP80	876	291	4	7.74	30.47	0.415	stable	pA1:I81lasma membrane-organelle membrane

## Sheet: Sheet2
Gene ID	Gene name	Description	Chr. location	Transcript ID	CDS (bp)	Peptide (aa)	Exon number	Isoelectric point (pI)	Molecular weight (g/mol)	Gravy	Stability	Localization
TRITD1Av1G106730	TtAQP01	Aquaporin	1A:291872776-291873820	TRITD1Av1G106730.1	792	263	3	8.4556	27,550.04	0.568	stable	endomembrane system
TRITD1Av1G115640	TtAQP02	Aquaporin-1	1A:313995544-313999131	TRITD1Av1G115640.1	903	300	4	8.9855	31,138.27	0.523	stable	organelle membrane-plasma membrane
TRITD1Bv1G107010	TtAQP03	Aquaporin	1B:318817661-318818691	TRITD1Bv1G107010.1	792	263	3	8.4555	27,584.06	0.566	stable	endomembrane system
TRITD1Bv1G119210	TtAQP04	Aquaporin-1	1B:357597257-357600945	TRITD1Bv1G119210.1	897	298	4	9.2101	30,956.98	0.509	stable	organelle membrane-endomembrane system
TRITD2Av1G071530	TtAQP05	Aquaporin	2A:168463195-168465934	TRITD2Av1G071530.6	894	297	3	9.0091	30,985.03	0.369	stable	plasma membrane-endomembrane system
TRITD2Av1G014760	TtAQP06	Aquaporin	2A:28765692-28767126	TRITD2Av1G014760.5	1059	352	2	9.6656	37,615.62	0.286	unstable	organelle membrane-plasma membrane
TRITD2Av1G222850	TtAQP07	Aquaporin	2A:610835394-610836651	TRITD2Av1G222850.1	798	265	3	9.2393	27,512.12	0.655	stable	endomembrane system
TRITD2Av1G224740	TtAQP08	Aquaporin	2A:616494287-616602000	TRITD2Av1G224740.6	888	295	3	7.7546	31,087.00	0.524	stable	endomembrane system-plasma membrane
TRITD2Av1G240050	TtAQP09	Aquaporin	2A:658137786-658139388	TRITD2Av1G240050.1	921	306	4	11.0550	33,732.59	-0.462	unstable	plasma membrane-organelle membrane
TRITD2Av1G243750	TtAQP10	Aquaporin	2A:666027209-666028138	TRITD2Av1G243750.1	747	248	3	6.3661	25,123.14	0.885	stable	endomembrane system
TRITD2Av1G243760	TtAQP11	Aquaporin	2A:666028528-666029533	TRITD2Av1G243760.1	789	262	3	7.4146	26,930.26	0.704	stable	endomembrane system-plasma membrane
TRITD2Bv1G080560	TtAQP12	Aquaporin	2B:211831394-211833811	TRITD2Bv1G080560.5	873	290	3	8.1126	30,356.38	0.612	stable	plasma membrane-endomembrane system
TRITD2Bv1G019580	TtAQP13	Aquaporin	2B:41930512-41931492	TRITD2Bv1G019580.1	855	284	2	9.4260	29,831.86	0.547	stable	endomembrane system-plasma membrane
TRITD2Bv1G184920	TtAQP14	Aquaporin	2B:546440942-546442147	TRITD2Bv1G184920.1	798	265	3	7.5638	27,477.00	0.615	stable	endomembrane system
TRITD2Bv1G187220	TtAQP15	Aquaporin	2B:553875272-553877472	TRITD2Bv1G187220.1	873	290	3	7.7528	30,382.09	0.508	stable	plasma membrane-endomembrane system
TRITD2Bv1G201750	TtAQP16	Aquaporin	2B:601236202-601237848	TRITD2Bv1G201750.2	867	288	4	8.9847	30,682.63	0.378	stable	plasma membrane-organelle membrane
TRITD2Bv1G204380	TtAQP17	Aquaporin	2B:611009444-611010369	TRITD2Bv1G204380.1	747	248	3	6.2005	25,136.11	0.838	stable	endomembrane system
TRITD2Bv1G204390	TtAQP18	Aquaporin	2B:611012470-611013456	TRITD2Bv1G204390.1	789	262	3	7.1932	26,914.18	0.73	stable	endomembrane system-plasma membrane
TRITD3Av1G050960	TtAQP19	Aquaporin	3A:115119740-115121003	TRITD3Av1G050960.1	777	258	5	6.8266	26,965.14	0.529	stable	endomembrane system-plasma membrane
TRITD3Av1G002890	TtAQP20	Aquaporin-1	3A:4813594-4814703	TRITD3Av1G002890.2	867	288	3	9.2032	29,795.94	0.658	stable	plasma membrane
TRITD3Av1G286310	TtAQP21	Aquaporin	3A:743892303-743893170	TRITD3Av1G286310.1	759	252	2	5.4721	25,516.64	0.899	stable	endomembrane system
TRITD3Bv1G057490	TtAQP22	Aquaporin	3B:156252117-156253282	TRITD3Bv1G057490.1	807	268	5	7.2187	27,975.28	0.489	stable	plasma membrane-organelle membrane
TRITD3Bv1G070600	TtAQP23	Aquaporin-like protein	3B:198474799-198475649	TRITD3Bv1G070600.1	756	251	2	7.1708	25,348.70	0.888	stable	endomembrane system
TRITD3Bv1G002420	TtAQP24	Aquaporin-1	3B:4683547-4684684	TRITD3Bv1G002420.2	867	288	3	9.2030	29,863.98	0.594	stable	plasma membrane
TRITD3Bv1G188130	TtAQP25	Aquaporin	3B:573800186-573801217	TRITD3Bv1G188130.1	765	254	4	6.9771	26,277.98	0.79	stable	plasma membrane-endomembrane system
TRITD3Bv1G282090	TtAQP26	Aquaporin	3B:832869981-832870841	TRITD3Bv1G282090.1	759	252	2	5.4721	25,530.67	0.9	stable	endomembrane system
TRITD4Av1G064260	TtAQP27	Aquaporin-1	4A:161323229-161327463	TRITD4Av1G064260.3	1179	392	6	8.6924	41,507.31	0.293	stable	endomembrane system
TRITD4Av1G141900	TtAQP28	Aquaporin SIP1.1	4A:447436590-447438273	TRITD4Av1G141900.2	735	244	3	8.4694	25,484.00	0.736	stable	endomembrane system-plasma membrane
TRITD4Av1G199100	TtAQP29	Aquaporin	4A:584041761-584043007	TRITD4Av1G199100.1	915	304	4	7.9327	31,775.60	0.467	stable	endomembrane system-plasma membrane
TRITD4Av1G205860	TtAQP30	Aquaporin-like protein	4A:597423573-597424630	TRITD4Av1G205860.2	879	292	2	7.7398	30,788.71	0.482	stable	plasma membrane-endomembrane system
TRITD4Av1G227310	TtAQP31	Aquaporin	4A:637637395-637638801	TRITD4Av1G227310.6	807	268	3	8.0194	27,674.42	0.938	stable	endomembrane system-plasma membrane
TRITD4Bv1G060070	TtAQP32	Aquaporin-like protein	4B:179783386-179785161	TRITD4Bv1G060070.1	735	244	3	8.4694	25,500.00	0.726	stable	endomembrane system-plasma membrane
TRITD4Bv1G007950	TtAQP33	Aquaporin	4B:19983264-19984718	TRITD4Bv1G007950.2	909	302	4	8.4212	31,701.46	0.433	stable	plasma membrane-endomembrane system
TRITD4Bv1G111480	TtAQP34	Aquaporin-1	4B:393352635-393356407	TRITD4Bv1G111480.2	897	298	4	10.0449	31,865.78	0.554	stable	endomembrane system
TRITD4Bv1G178880	TtAQP35	Aquaporin	4B:604978964-604980456	TRITD4Bv1G178880.1	831	276	3	6.7012	28,438.07	0.829	stable	endomembrane system-plasma membrane
TRITD4Bv1G194950	TtAQP36	Aquaporin-like protein	4B:645907753-645908983	TRITD4Bv1G194950.1	768	255	3	6.5988	26,395.11	0.805	stable	endomembrane system
TRITD4Bv1G199390	TtAQP37	Aquaporin	4B:656026296-656027282	TRITD4Bv1G199390.1	987	328	1	8.5899	34,400.86	0.423	stable	organelle membrane
TRITD5Av1G056620	TtAQP38	Aquaporin	5A:144857204-144858261	TRITD5Av1G056620.1	861	286	3	7.7576	29,678.23	0.544	stable	plasma membrane-endomembrane system
TRITD5Av1G131660	TtAQP39	Aquaporin	5A:372668568-372669643	TRITD5Av1G131660.1	873	290	3	8.4442	30,771.64	0.382	stable	plasma membrane-organelle membrane
TRITD5Av1G186110	TtAQP40	Aquaporin-like protein	5A:503665213-503666263	TRITD5Av1G186110.1	876	291	3	8.7413	30,272.19	0.603	stable	plasma membrane-endomembrane system
TRITD5Av1G189030	TtAQP41	Aquaporin-like protein	5A:511567872-511571606	TRITD5Av1G189030.3	870	289	4	6.6293	30,115.63	0.428	stable	plasma membrane-organelle membrane
TRITD5Av1G246290	TtAQP42	Aquaporin-like protein	5A:640124836-640126204	TRITD5Av1G246290.2	492	163	3	4.6573	16,709.38	0.717	stable	endomembrane system-organelle membrane
TRITD5Av1G248170	TtAQP43	Aquaporin	5A:645070652-645071737	TRITD5Av1G248170.2	780	259	4	7.6208	27,148.26	0.725	stable	plasma membrane
TRITD5Av1G249780	TtAQP44	Aquaporin	5A:648673091-648673969	TRITD5Av1G249780.1	879	292	1	8.4523	30,297.03	0.43	stable	plasma membrane-endomembrane system
TRITD5Bv1G110890	TtAQP45	Aquaporin	5B:326031455-326032601	TRITD5Bv1G110890.1	939	312	4	8.3234	33,268.52	0.336	stable	plasma membrane
TRITD5Bv1G176040	TtAQP46	Aquaporin-like protein	5B:514459555-514460665	TRITD5Bv1G176040.1	876	291	3	8.9651	30,178.06	0.596	stable	plasma membrane-endomembrane system
TRITD5Bv1G180190	TtAQP47	Aquaporin	5B:523750052-523753478	TRITD5Bv1G180190.2	867	288	4	7.0281	29,931.47	0.458	stable	plasma membrane-organelle membrane
TRITD5Bv1G252790	TtAQP48	Aquaporin-like protein	5B:699816969-699817844	TRITD5Bv1G252790.1	876	291	1	8.1381	30,481.37	0.541	stable	endomembrane system-plasma membrane
TRITD5Bv1G252800	TtAQP49	Aquaporin	5B:699844773-699845648	TRITD5Bv1G252800.1	876	291	1	8.7279	30,579.46	0.496	stable	plasma membrane-endomembrane system
TRITD6Av1G141150	TtAQP50	Aquaporin	6A:412169166-412171998	TRITD6Av1G141150.1	888	295	4	9.2209	31,672.59	0.208	unstable	endomembrane system-plasma membrane
TRITD6Av1G156510	TtAQP51	Aquaporin	6A:453724352-453726850	TRITD6Av1G156510.1	873	290	4	9.0105	30,911.77	0.345	stable	plasma membrane
TRITD6Av1G159570	TtAQP52	Aquaporin	6A:461489593-461490533	TRITD6Av1G159570.1	750	249	3	5.9490	25,193.18	0.88	stable	endomembrane system
TRITD6Av1G021120	TtAQP53	Aquaporin	6A:50394573-50395460	TRITD6Av1G021120.1	888	295	1	9.0372	30,945.71	0.397	stable	plasma membrane-endomembrane system
TRITD6Av1G189010	TtAQP54	Aquaporin-1	6A:535764024-535766967	TRITD6Av1G189010.1	888	295	5	7.2464	31,604.46	0.442	stable	endomembrane system
TRITD6Av1G223080	TtAQP55	Aquaporin	6A:606551165-606552256	TRITD6Av1G223080.2	879	292	3	8.1273	30,875.67	0.395	stable	plasma membrane
TRITD6Av1G223090	TtAQP56	Aquaporin	6A:606560728-606561819	TRITD6Av1G223090.1	879	292	3	8.1192	30,950.80	0.375	stable	plasma membrane
TRITD6Bv1G135730	TtAQP57	Aquaporin	6B:444729518-444732273	TRITD6Bv1G135730.9	867	288	4	7.7295	30,555.34	0.476	stable	plasma membrane-endomembrane system
TRITD6Bv1G142920	TtAQP58	Aquaporin	6B:467308861-467311553	TRITD6Bv1G142920.1	873	290	4	9.0026	30,841.72	0.348	stable	plasma membrane
TRITD6Bv1G145380	TtAQP59	Aquaporin	6B:474680490-474681409	TRITD6Bv1G145380.2	750	249	3	5.9490	25,265.29	0.884	stable	endomembrane system
TRITD6Bv1G179310	TtAQP60	Aquaporin-1	6B:567759708-567762671	TRITD6Bv1G179310.1	888	295	5	7.2464	31,674.55	0.422	stable	endomembrane system-plasma membrane
TRITD6Bv1G209810	TtAQP61	Aquaporin	6B:650371727-650372282	TRITD6Bv1G209810.1	474	157	2	8.3289	16,994.88	0.319	stable	plasma membrane-organelle membrane
TRITD6Bv1G223370	TtAQP62	Aquaporin	6B:684858709-684859816	TRITD6Bv1G223370.4	879	292	3	8.1273	30,875.67	0.395	stable	plasma membrane
TRITD6Bv1G223380	TtAQP63	Aquaporin	6B:684865833-684866923	TRITD6Bv1G223380.1	879	292	3	8.1192	30,950.80	0.375	stable	plasma membrane
TRITD6Bv1G033710	TtAQP64	Aquaporin	6B:93074981-93075868	TRITD6Bv1G033710.1	888	295	1	9.0409	30,857.54	0.408	stable	plasma membrane-endomembrane system
TRITD7Av1G061100	TtAQP65	Aquaporin-1	7A:140065620-140068729	TRITD7Av1G061100.5	903	300	5	7.4526	32,239.22	0.411	stable	endomembrane system-plasma membrane
TRITD7Av1G063490	TtAQP66	Aquaporin	7A:146001107-146002306	TRITD7Av1G063490.2	918	305	4	7.9137	32,221.24	0.48	stable	plasma membrane-endomembrane system
TRITD7Av1G076170	TtAQP67	Aquaporin	7A:180642728-180644562	TRITD7Av1G076170.2	837	278	4	9.5689	29,564.28	0.392	stable	plasma membrane-endomembrane system
TRITD7Av1G156560	TtAQP68	Aquaporin-like protein	7A:422961409-422962500	TRITD7Av1G156560.1	840	279	3	9.5473	28,555.66	0.738	stable	endomembrane system-plasma membrane
TRITD7Av1G176380	TtAQP69	Aquaporin	7A:480074592-480075527	TRITD7Av1G176380.2	750	249	3	5.4647	25,307.34	0.892	stable	endomembrane system
TRITD7Av1G190680	TtAQP70	Aquaporin	7A:515166999-515168289	TRITD7Av1G190680.1	840	279	5	7.4694	29,876.73	0.456	stable	plasma membrane-endomembrane system
TRITD7Av1G276680	TtAQP71	Aquaporin	7A:717971744-717974721	TRITD7Av1G276680.1	702	233	3	9.7066	24,656.86	0.709	stable	endomembrane system-plasma membrane
TRITD7Bv1G038470	TtAQP72	Aquaporin-1	7B:106101361-106104673	TRITD7Bv1G038470.5	903	300	5	7.4526	32,269.24	0.41	stable	endomembrane system-plasma membrane
TRITD7Bv1G040260	TtAQP73	Aquaporin	7B:111049674-111050880	TRITD7Bv1G040260.1	915	304	4	7.9137	32,140.12	0.48	stable	endomembrane system-plasma membrane
TRITD7Bv1G000850	TtAQP74	Aquaporin-like protein	7B:1343959-1344834	TRITD7Bv1G000850.1	876	291	1	8.4453	30,529.42	0.52	stable	endomembrane system-plasma membrane
TRITD7Bv1G000860	TtAQP75	Aquaporin-like protein	7B:1388451-1389326	TRITD7Bv1G000860.1	876	291	1	8.1381	30,449.33	0.529	stable	plasma membrane-endomembrane system
TRITD7Bv1G051580	TtAQP76	Aquaporin	7B:142902213-142912662	TRITD7Bv1G051580.2	837	278	4	9.5689	29,533.27	0.415	stable	plasma membrane-endomembrane system
TRITD7Bv1G115860	TtAQP77	Aquaporin-like protein	7B:366280603-366281682	TRITD7Bv1G115860.1	546	181	4	10.0250	18,745.90	0.351	stable	organelle membrane
TRITD7Bv1G138210	TtAQP78	Aquaporin	7B:434953678-434954631	TRITD7Bv1G138210.2	747	248	3	5.4647	25,208.21	0.871	stable	endomembrane system
TRITD7Bv1G000470	TtAQP79	Aquaporin	7B:788838-789692	TRITD7Bv1G000470.1	855	284	1	9.9841	29,811.72	0.412	stable	plasma membrane-endomembrane system
TRITD0Uv1G066680	TtAQP80	n/a	Un:166182308-166185014	TRITD0Uv1G066680.2	876	291	4	7.7463	30,472.04	0.415	stable	plasma membrane-organelle membrane
					Max	Max	Max	Max	Max	Max
					1179	392	6	11.0550	41,507.31	0.938
					Min	Min	Min	Min	Min	Min
					474	157	1	4.6573	16,709.38	-0.462
