# Supplementary material for: Meta-Analysis of Aquaporin Gene Family in <em>Triticum turgidum</em> and Its Expression Profile in Response to Salt Stress
Source: Preprints.org preprint supplement (doi:10.20944/preprints202212.0281.v1), 2022-12-15
Supplement: Supplementary file 3 [file Table S3.xlsx]

## Sheet: Sheet1
Gene 1	Gene 2	Score	Ka	Ks	Ka_Ks	Time(MYA)	Duplication type
TtAQP09	TtAQP51	85	0.377	0.773	0.487	59.4615	Segmental
TtAQP45	TtAQP61	85	0.102	0.367	0.279	28.2308	Segmental
TtAQP55	TtAQP61	85	0.109	0.366	0.3	28.1538	Segmental
TtAQP56	TtAQP61	85	0.106	0.311	0.342	23.9231	Segmental
TtAQP61	TtAQP62	85	0.108	0.358	0.302	27.5385	Segmental
TtAQP61	TtAQP63	85	0.109	0.368	0.298	28.3077	Segmental
TtAQP08	TtAQP50	86	0.124	0.408	0.304	31.3846	Segmental
TtAQP51	TtAQP61	86	0.065	0.45	0.144	34.6154	Segmental
TtAQP8	TtAQP57	87	0.055	0.335	0.16	25.7692	Segmental
TtAQP9	TtAQP58	87	0.378	0.695	0.54	53.4615	Segmental
TtAQP15	TtAQP50	87	0.126	0.399	0.316	30.6923	Segmental
TtAQP17	TtAQP59	87	0.063	0.366	0.173	28.1538	Segmental
TtAQP31	TtAQP35	87	0.068	0.121326	0.53	9.33277	Segmental
TtAQP58	TtAQP61	87	0.065	0.387533	0.169	29.8102	Segmental
TtAQP25	TtAQP43	88	0.086	0.3379	0.254	25.9923	Segmental
TtAQP10	TtAQP52	89	0.059	0.312365	0.187	24.0281	Segmental
TtAQP17	TtAQP52	89	0.058	0.29464	0.195	22.6646	Segmental
TtAQP33	TtAQP66	90	0.059	0.17258	0.342	13.2754	Segmental
TtAQP33	TtAQP73	90	0.06145	0.181264	0.339	13.9434	Segmental
TtAQP19	TtAQP22	91	0.0491	0.160536	0.306	12.3489	Segmental
TtAQP30	TtAQP49	91	0.0279	0.2552	0.109	19.6308	Segmental
TtAQP30	TtAQP75	91	0.01851	0.272565	0.0679	20.9665	Segmental
TtAQP39	TtAQP55	91	0.020641	0.3016	0.0684	23.2	Segmental
TtAQP45	TtAQP55	91	0.020495	0.27335	0.07497	21.0269	Segmental
TtAQP29	TtAQP66	92	0.05611	0.13938	0.402	10.7215	Segmental
TtAQP29	TtAQP73	92	0.05766	0.13024	0.4426	10.0185	Segmental
TtAQP30	TtAQP48	92	0.021481	0.23618	0.09094	18.1677	Segmental
TtAQP30	TtAQP74	92	0.024706	0.19576	0.1262	15.0585	Segmental
TtAQP39	TtAQP56	92	0.013439	0.27825	0.04829	21.4038	Segmental
TtAQP39	TtAQP62	92	0.020658	0.26215	0.0788	20.1654	Segmental
TtAQP45	TtAQP56	92	0.013344	0.282421	0.04724	21.7247	Segmental
TtAQP45	TtAQP62	92	0.020511	0.247753	0.08278	19.0579	Segmental
TtAQP45	TtAQP63	92	0.00938	0.26169	0.03584	20.13	Segmental
TtAQP74	TtAQP75	92	0.028309	0.263434	0.10746	20.2642	Tandem
TtAQP36	TtAQP42	93	0.020183	0.19434	0.10385	14.9492	Segmental
TtAQP39	TtAQP63	93	0.009446	0.282993	0.03338	21.7687	Segmental
TtAQP41	TtAQP71	93	0.042825	0.165536	0.2587	12.7335	Segmental
TtAQP41	TtAQP80	93	0.05259	0.13872	0.37911	10.6708	Segmental
TtAQP47	TtAQP71	93	0.0387182	0.17116	0.22621	13.1662	Segmental
TtAQP47	TtAQP80	93	0.0375589	0.139939	0.26839	10.7646	Segmental
TtAQP48	TtAQP49	93	0.022345	0.219648	0.1017	16.896	Tandem
TtAQP48	TtAQP74	93	0.0239861	0.196315	0.12218	15.1011	Segmental
TtAQP48	TtAQP75	93	0.00949881	0.26105	0.0363	20.0808	Segmental
TtAQP5	TtAQP12	94	0.0695268	0.140609	0.49447	10.8161	Segmental
TtAQP8	TtAQP15	94	0.0116261	0.203335	0.057177	15.6411	Segmental
TtAQP20	TtAQP24	94	0.0309827	0.14193	0.218293	10.9177	Segmental
TtAQP29	TtAQP33	94	0.0372108	0.0951199	0.391199	7.31692	Segmental
TtAQP49	TtAQP75	94	0.0126769	0.186089	0.0681228	14.3145	Segmental
TtAQP7	TtAQP14	95	0.017805	0.106977	0.166437	8.22901	Segmental
TtAQP37	TtAQP44	95	0.0190335	0.126765	0.150149	9.75112	Segmental
TtAQP41	TtAQP47	95	0.0193872	0.0982711	0.197282	7.55932	Segmental
TtAQP02	TtAQP04	96	0.0109906	0.0904645	0.121491	6.95881	Segmental
TtAQP09	TtAQP61	96	0.18797	0.252214	0.745282	19.4011	Segmental
TtAQP11	TtAQP18	96	0.015958	0.0750626	0.212597	5.77405	Segmental
TtAQP55	TtAQP56	96	0.00623866	0.130028	0.0479792	10.0022	Tandem
TtAQP55	TtAQP63	96	0.0101485	0.133307	0.0761285	10.2544	Segmental
TtAQP56	TtAQP62	96	0.00624353	0.129715	0.0481326	9.9781	Segmental
TtAQP56	TtAQP63	96	0.00388904	0.149149	0.0260748	11.473	Segmental
TtAQP62	TtAQP63	96	0.0101564	0.117277	0.0866021	9.02128	Tandem
TtAQP06	TtAQP13	97	0.00322408	0.0898712	0.0358744	6.91317	Segmental
TtAQP10	TtAQP17	97	0.0131089	0.0519238	0.252465	3.99414	Segmental
TtAQP40	TtAQP46	97	0.00960397	0.0657595	0.146047	5.05842	Segmental
TtAQP50	TtAQP57	97	0.0587152	0.144511	0.406303	11.1162	Segmental
TtAQP51	TtAQP58	97	0.00468629	0.101196	0.0463092	7.78429	Segmental
TtAQP52	TtAQP59	97	0.0073756	0.0694446	0.106208	5.34189	Segmental
TtAQP53	TtAQP64	97	0.0133198	0.0551314	0.2416	4.24087	Segmental
TtAQP55	TtAQP62	97	-0.0	0.119489	-0.0	9.19146	Segmental
TtAQP66	TtAQP73	97	0.0045639	0.104214	0.0437938	8.01643	Segmental
TtAQP67	TtAQP76	97	0.00816334	0.0639207	0.12771	4.91698	Segmental
TtAQP69	TtAQP78	97	0.0111977	0.0854256	0.131081	6.5712	Segmental
TtAQP71	TtAQP80	97	0.0099603	0.0668345	0.149029	5.14112	Segmental
TtAQP01	TtAQP03	98	0.00710064	0.0475595	0.1493	3.65842	Segmental
TtAQP21	TtAQP26	98	0.00182481	0.0460895	0.0395928	3.54535	Segmental
TtAQP28	TtAQP32	98	0.00377953	0.0366885	0.103017	2.82219	Segmental
TtAQP39	TtAQP45	98	0.0001	0.0315361	0	2.42585	Segmental
TtAQP54	TtAQP60	98	0.00462251	0.0593013	0.0779494	4.56164	Segmental
TtAQP65	TtAQP72	98	0.00151286	0.06281	0.02408	4.83154	Segmental
