# Supplementary material for: Meta-Analysis of Aquaporin Gene Family in <em>Triticum turgidum</em> and Its Expression Profile in Response to Salt Stress
Source: Preprints.org preprint supplement (doi:10.20944/preprints202212.0281.v1), 2022-12-15
Supplement: Supplementary file 4 [file Table S4.xlsx]

## Sheet: Sheet1
	cis-elements	ABRE	AuxRR-core	ERE	G-Box	MBS	TCA-element	W-Box	WUN-motif	ARE	MYB	O2-site	TC-rich repeats	GARE-motif	LTR	Box 4	MRE	TGACG-motif	TGA-element	P-box	GATA-motif	CAT-box	CGTCA-motif
Gene name	Function	abscisic acid responsiveness	auxin responsiveness	ethylene responsiveness	light responsive	MYB binding site involved in drought-inducibility and flavonoid biosynthetic genes regulation	salicylic acid responsiveness	WRKY binding site involved in abiotic stress responsiveness	Wunding abiotic stress responsiveness	anaerobic induction	stress responsive	zein metabolism regulation	defense and stress responsiveness	gibberellin-responsive element	low-temperature responsiveness	light responsive element	MYB binding site involved in light responsiveness	MeJA-responsiveness	auxin-responsive element	gibberellin-responsive element	light responsive element	related to meristem expression	MeJA-responsiveness
TtAQP01		3	0	0	2	1	0	1	0	1	3	1	0	0	0	0	0	1	0	0	0	2	0
TtAQP02		1	0	0	2	0	0	1	0	1	3	1	0	1	0	0	0	1	0	0	1	1	1
TtAQP03		3	0	0	2	1	0	1	0	0	3	0	1	1	1	0	0	1	0	0	0	1	1
TtAQP04		1	0	0	1	1	2	1	0	1	4	0	0	0	0	0	0	1	1	1	0	1	1
TtAQP05		1	0	0	2	1	1	1	0	0	3	1	0	0	0	0	0	1	1	1	0	1	0
TtAQP06		0	0	0	1	1	1	0	0	0	4	1	1	1	0	0	0	1	1	1	0	3	1
TtAQP07		1	0	0	2	0	0	0	0	1	0	0	0	0	1	1	0	1	0	0	0	1	1
TtAQP08		1	0	0	1	0	0	0	0	1	1	0	0	0	1	1	0	1	1	0	0	2	1
TtAQP09		1	0	0	0	0	0	0	0	1	3	0	0	1	0	0	0	1	0	1	0	3	1
TtAQP10		1	1	0	2	1	2	1	0	0	3	0	0	0	1	1	0	1	0	0	1	3	1
TtAQP11		3	0	0	2	1	0	0	0	0	3	0	1	0	1	0	0	1	0	0	0	2	1
TtAQP12		1	0	0	1	0	0	0	0	0	2	0	0	0	1	0	0	1	0	0	1	1	1
TtAQP13		1	0	0	1	0	0	0	1	1	1	0	1	0	1	0	0	1	1	1	1	2	1
TtAQP14		2	0	1	2	1	1	0	0	1	3	0	0	0	0	0	0	1	1	0	0	2	1
TtAQP15		1	1	0	1	0	0	0	0	1	3	1	0	0	1	1	0	1	1	0	0	3	1
TtAQP16		3	0	0	1	0	1	1	0	0	1	1	1	0	0	0	0	1	0	0	0	3	1
TtAQP17		1	1	0	2	1	0	1	0	1	3	0	0	0	1	1	1	1	1	0	1	1	1
TtAQP18		1	0	0	2	0	0	0	0	1	3	0	0	0	0	1	0	1	0	0	1	3	1
TtAQP19		3	0	0	2	0	0	1	0	1	4	1	1	0	0	0	0	1	0	0	1	2	1
TtAQP20		0	0	0	0	2	1	1	0	1	4	0	0	0	0	0	0	1	0	1	0	1	1
TtAQP21		0	0	0	1	0	1	0	0	1	4	0	1	0	0	1	0	0	0	0	0	1	0
TtAQP22		3	0	0	2	0	0	0	0	1	4	0	0	1	0	0	1	0	0	0	0	3	0
TtAQP23		3	0	0	1	0	0	1	0	0	3	1	0	0	0	0	0	1	0	0	1	2	1
TtAQP24		3	0	1	1	1	0	0	0	0	3	0	1	0	0	1	0	1	0	0	0	3	1
TtAQP25		1	0	0	1	0	1	0	0	0	4	0	0	0	0	0	0	1	0	1	0	1	1
TtAQP26		0	0	0	1	1	0	0	0	1	4	0	0	0	1	1	0	0	0	0	0	1	0
TtAQP27		4	0	0	2	1	0	1	1	0	3	1	1	0	0	0	0	1	0	0	0	3	1
TtAQP28		1	0	0	2	1	1	0	0	1	4	0	0	1	1	0	1	1	0	0	0	2	1
TtAQP29		3	1	0	2	1	2	1	0	1	4	0	1	0	0	1	1	0	0	0	0	1	0
TtAQP30		3	0	0	1	0	1	1	0	1	5	0	1	0	0	1	0	1	0	1	1	2	1
TtAQP31		4	0	0	1	0	1	0	0	1	1	0	0	0	1	0	0	1	1	0	1	1	1
TtAQP32		1	1	0	0	1	1	1	0	1	4	0	1	0	0	1	0	1	1	1	1	2	1
TtAQP33		1	0	0	2	0	0	1	0	1	5	1	0	0	0	0	1	1	0	0	0	3	1
TtAQP34		1	0	1	1	1	0	1	0	1	4	0	0	0	0	0	0	1	1	0	0	1	1
TtAQP35		1	0	0	1	0	0	0	0	0	1	0	0	0	1	0	0	1	1	0	0	1	1
TtAQP36		1	0	0	2	0	1	1	0	1	2	0	0	0	0	1	0	1	0	0	1	1	1
TtAQP37		0	0	0	0	0	0	1	0	0	2	0	0	0	0	1	0	0	0	0	0	1	0
TtAQP38		3	0	1	2	0	1	1	0	1	3	1	0	1	0	1	0	1	1	1	0	1	1
TtAQP39		0	0	0	0	0	0	0	1	1	1	0	0	0	1	0	0	0	0	0	1	2	0
TtAQP40		3	0	0	2	0	1	1	0	0	2	0	0	0	1	1	0	1	1	0	0	1	1
TtAQP41		3	0	1	1	0	0	0	0	1	3	1	1	0	0	1	0	0	0	0	1	2	0
TtAQP42		1	1	1	2	0	0	1	0	0	0	0	0	1	0	0	0	1	0	0	1	1	1
TtAQP43		1	0	0	0	1	1	0	1	0	3	0	0	1	0	0	0	1	0	0	0	1	1
TtAQP44		1	0	0	1	0	0	1	0	1	3	0	1	0	1	0	0	1	0	0	0	1	1
TtAQP45		0	0	1	0	0	0	1	0	1	3	1	1	0	0	0	0	1	0	1	1	2	1
TtAQP46		4	0	0	1	0	0	0	0	0	1	1	0	0	1	1	0	1	1	1	0	1	1
TtAQP47		1	1	0	2	1	1	1	0	0	3	0	0	1	0	0	0	1	0	0	0	1	1
TtAQP48		3	0	1	2	0	0	0	0	0	2	1	0	0	1	0	0	1	0	1	0	2	1
TtAQP49		1	0	0	2	0	0	1	0	1	3	0	0	0	0	1	0	1	0	1	0	2	1
TtAQP50		1	0	0	2	1	1	0	0	0	4	1	0	1	1	1	0	1	1	0	1	2	1
TtAQP51		0	0	0	0	0	0	0	1	1	3	1	0	0	1	1	0	1	0	0	1	3	1
TtAQP52		1	1	0	1	0	0	0	1	1	3	0	0	0	1	0	0	1	0	1	0	2	1
TtAQP53		1	0	1	2	0	0	1	1	1	0	0	1	0	0	1	0	1	0	0	0	2	1
TtAQP54		3	0	0	1	0	0	1	0	0	4	0	0	0	1	1	0	1	0	0	0	3	1
TtAQP55		3	0	1	2	0	1	1	0	0	4	0	0	0	0	0	0	1	0	1	1	2	1
TtAQP56		1	0	0	1	1	1	1	0	1	2	1	0	0	1	0	0	1	0	0	1	2	0
TtAQP57		3	0	0	2	1	1	0	0	0	3	1	0	0	1	0	0	1	1	0	1	2	1
TtAQP58		3	0	1	2	0	0	1	0	1	2	1	0	0	1	0	0	1	1	1	1	2	1
TtAQP59		0	0	0	0	1	1	0	0	1	1	0	0	0	1	1	0	0	0	0	0	1	0
TtAQP60		0	0	1	1	0	1	0	0	1	4	1	0	1	0	1	0	0	0	0	0	2	0
TtAQP61		1	0	0	1	1	0	0	1	0	4	0	0	0	1	0	0	1	0	0	0	2	1
TtAQP62		1	0	0	1	0	0	0	0	1	4	1	1	0	0	0	0	1	0	0	0	3	1
TtAQP63		1	0	1	2	1	0	0	0	0	3	0	0	0	1	0	0	1	1	0	0	1	1
TtAQP64		0	0	0	0	0	0	1	1	0	3	1	1	1	0	1	0	1	0	1	1	2	1
TtAQP65		1	0	0	2	0	1	0	0	1	4	1	1	0	1	1	0	1	0	0	0	2	1
TtAQP66		4	0	0	1	0	0	0	0	0	2	0	0	0	0	0	0	1	0	0	0	2	1
TtAQP67		3	0	1	1	0	0	1	0	0	2	1	0	0	0	0	0	1	0	1	1	1	1
TtAQP68		1	1	0	1	0	0	0	0	0	3	1	0	0	0	0	0	1	1	0	0	3	1
TtAQP69		1	0	0	2	1	0	0	0	0	4	0	0	0	1	0	0	1	1	0	1	3	1
TtAQP70		1	0	0	1	1	0	0	0	0	5	1	0	0	0	1	0	1	0	0	0	3	1
TtAQP71		1	0	0	2	1	0	1	0	1	3	0	0	0	0	0	0	0	0	0	1	2	0
TtAQP72		0	0	1	2	1	2	0	0	1	4	0	0	1	0	1	0	0	0	0	0	3	0
TtAQP73		4	1	0	2	0	0	1	0	0	3	0	0	0	0	1	0	1	1	1	0	1	0
TtAQP74		3	1	1	2	0	0	0	1	0	4	1	0	0	1	0	0	1	0	0	0	2	1
TtAQP75		3	0	0	1	0	0	1	1	1	4	1	1	0	0	1	0	0	0	1	1	2	0
TtAQP76		3	0	1	2	0	0	1	0	1	2	1	0	0	1	0	0	1	0	0	0	1	1
TtAQP77		3	0	0	2	0	1	1	0	1	4	0	1	0	1	1	1	0	0	0	1	2	0
TtAQP78		1	1	1	1	1	1	0	0	1	4	1	0	0	1	0	1	1	0	0	1	3	1
TtAQP79		1	0	1	1	1	0	1	0	0	1	0	0	0	0	1	0	0	1	0	0	2	0
TtAQP80		3	0	0	2	0	0	1	0	1	3	0	0	0	0	1	0	1	1	0	1	3	1
		132	12	19	108	32	33	40	11	46	234	31	21	14	34	34	7	66	24	21	30	150	62
	cis-elements	ABRE+PC89:P89	AuxRR-core	ERE	G-Box	MBS	TCA-element	W-Box	WUN-motif	ARE	MYB	O2-site	TC-rich repeats	GARE-motif	LTR	Box 4	MRE	TGACG-motif	TGA-element	P-box	GATA-motif	CAT-box	CGTCA-motif
